# Supplementary material for: 2D graphene/FeOCl heterojunctions with enhanced tribology performance as a lubricant additive for liquid paraffin
Source: Royal Society of Chemistry journal article supplement (doi:10.1039/d1ra06650a), 2022-01-01
Supplement: d1ra06650a1.pdf [file d1ra06650a1.pdf]

## 2D graphene/FeOCl heterojunctions with enhanced tribology performance as a lubricant additive for liquid paraffin

Mengxin Xie<sup>a</sup>, Bingli Pan<sup>a,b,\*</sup>, Ning Li<sup>a</sup>, Shuang Zhao<sup>a,\*</sup>, Junjiang Yan<sup>a</sup>, Shihao Guo<sup>a</sup>, Zhe Chen<sup>a</sup>, and Honggang Wang<sup>c,\*\*</sup>

---

<sup>a</sup> Institute of Henan Polymer Composites, School of Chemical Engineering, Henan University of Science and Technology, 471000 Luoyang, PR China;

<sup>b</sup> National United Engineering Laboratory for Advanced Bearing Tribology, Henan University of Science and Technology, 471000 Luoyang, PR China; [blpan@haust.edu.cn](mailto:blpan@haust.edu.cn)

<sup>c</sup> State Key Laboratory of Solid Lubrication, Lanzhou Institute of Chemical Physics, Chinese Academy of Sciences, Lanzhou, 730000, PR China

## S1. Experimental details

The arithmetic mean diameters of each ball ( $d_1$ ,  $d_2$ ,  $d_3$ ) in the experiment were calculated from Equation 1. The lower three fixed balls were not disturbed during the measurement, and the wear diameter of each ball was collected through the image acquisition system after each friction test.

### S1.1. Tribological Parameters

#### S1.1.1 Contact stress of steel ball

Under the action of external force  $P$ , a circular contact area of radius  $D_h$  is formed due to local elastic deformation of the surface.

$$D_h = \sqrt[3]{6 \times P \times \frac{\frac{1 - \mu_1^2}{E_1} + \frac{1 - \mu_2^2}{E_2}}{\frac{1}{R_1} + \frac{1}{R_2}}} \quad (1)$$

Where,  $P=0.40825\text{N}$ , the actual load (Newtons) on the three horizontal spheres, which is 0.40825 times the applied load (N).

$\mu=0.3$ , poisson's ratio of the material

$E=2.085 \times 10^5 \text{ MPa}$ , the modulus of elasticity of the material

$R=6.35 \text{ mm}$ , the radius of the steel ball

The maximum Hertz contact stress ( $\tau_{\max}$ ) of the friction pair is calculated by the following form:

$$\tau_{\max} = \frac{N}{S} \quad (2)$$

Where,  $S = 0.25\pi D_h^2$

S1.1.1. Mean wear scar diameter (MWSD)

$$d = \frac{d_1 + d_2 + d_3}{3} \quad (3)$$

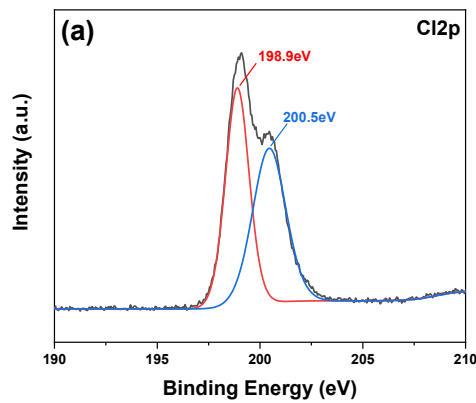

(c)

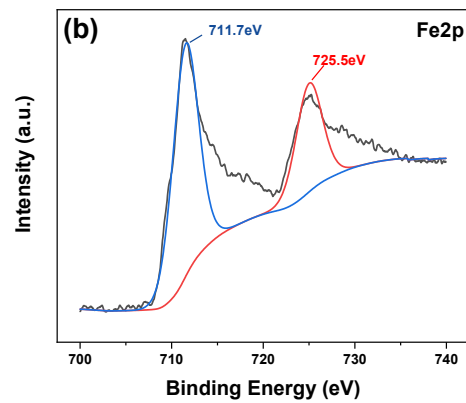

(d)

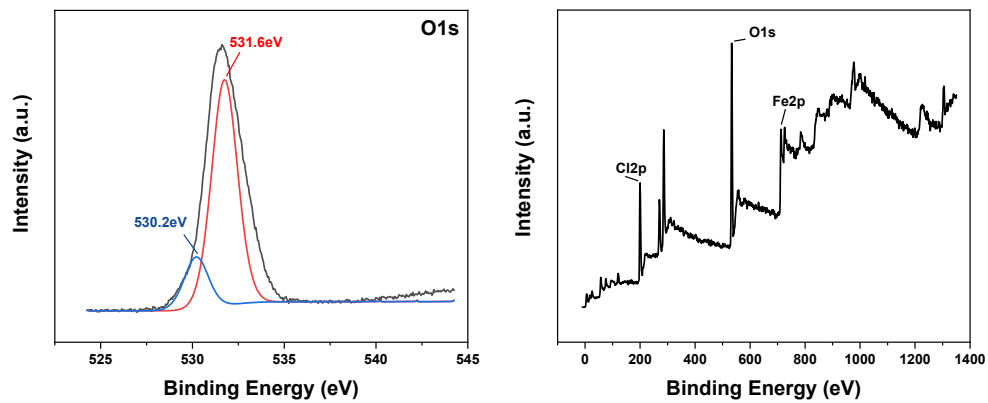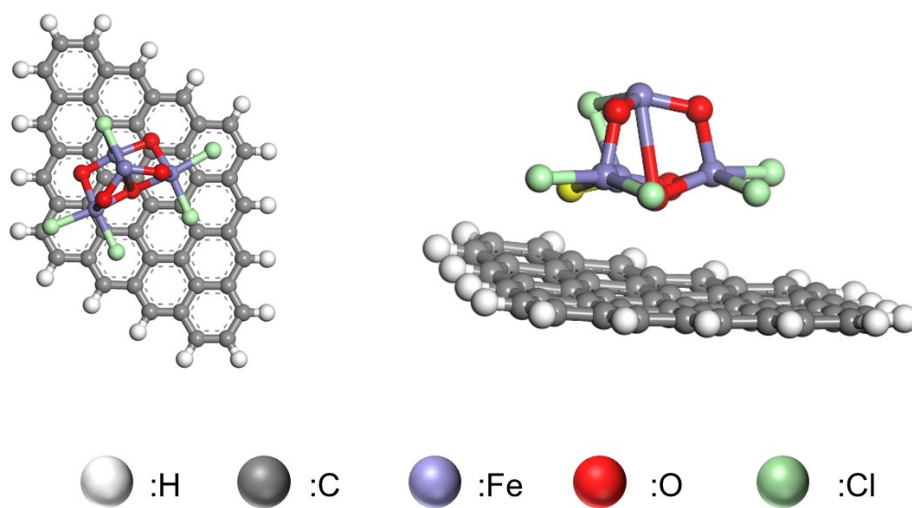

Figure.S2 Adsorption model of FeOCl and G: (a) top view ; (b) front view
